# Supplementary material
Source: Frontiers journal article supplement (https://www.frontiersin.org/articles/362882)
Supplement: Presentation_1.pdf [file Presentation_1.pdf]

## Supporting Information

### High-Throughput *flaA* Short Variable Region Sequencing to Assess *Campylobacter* Diversity in Fecal Samples from Birds

Qian Zhang<sup>1</sup>, Gabriel A. Al-Ghalith<sup>2</sup>, Mayumi Kobayashi<sup>3</sup>, Takahiro Segawa<sup>4,5</sup>, Mitsuto Maeda<sup>3</sup>, Satoshi Okabe<sup>3</sup>, D. Knights<sup>1,2,6</sup>, and Satoshi Ishii<sup>1,3,7,\*</sup>

<sup>1</sup>BioTechnology Institute, University of Minnesota, St. Paul, MN, USA

<sup>2</sup>Bioinformatics and Computational Biology, University of Minnesota, Minneapolis, MN, USA

<sup>3</sup>Division of Environmental Engineering, Graduate School of Engineering, Hokkaido University, Sapporo, Japan

<sup>4</sup>Center for Life Science Research, University of Yamanashi, Yamanashi, Japan

<sup>5</sup>National Institute of Polar Research, Tokyo, Japan

<sup>6</sup>Department of Computer Science and Engineering, University of Minnesota, Minneapolis, MN, USA

<sup>7</sup>Department of Soil, Water, and Climate, University of Minnesota, St. Paul, MN, USA

**Pages:** 6

**Figures:** 2

**Tables:** 2

\*Correspondence: Satoshi Ishii, ishi0040@umn.edu.

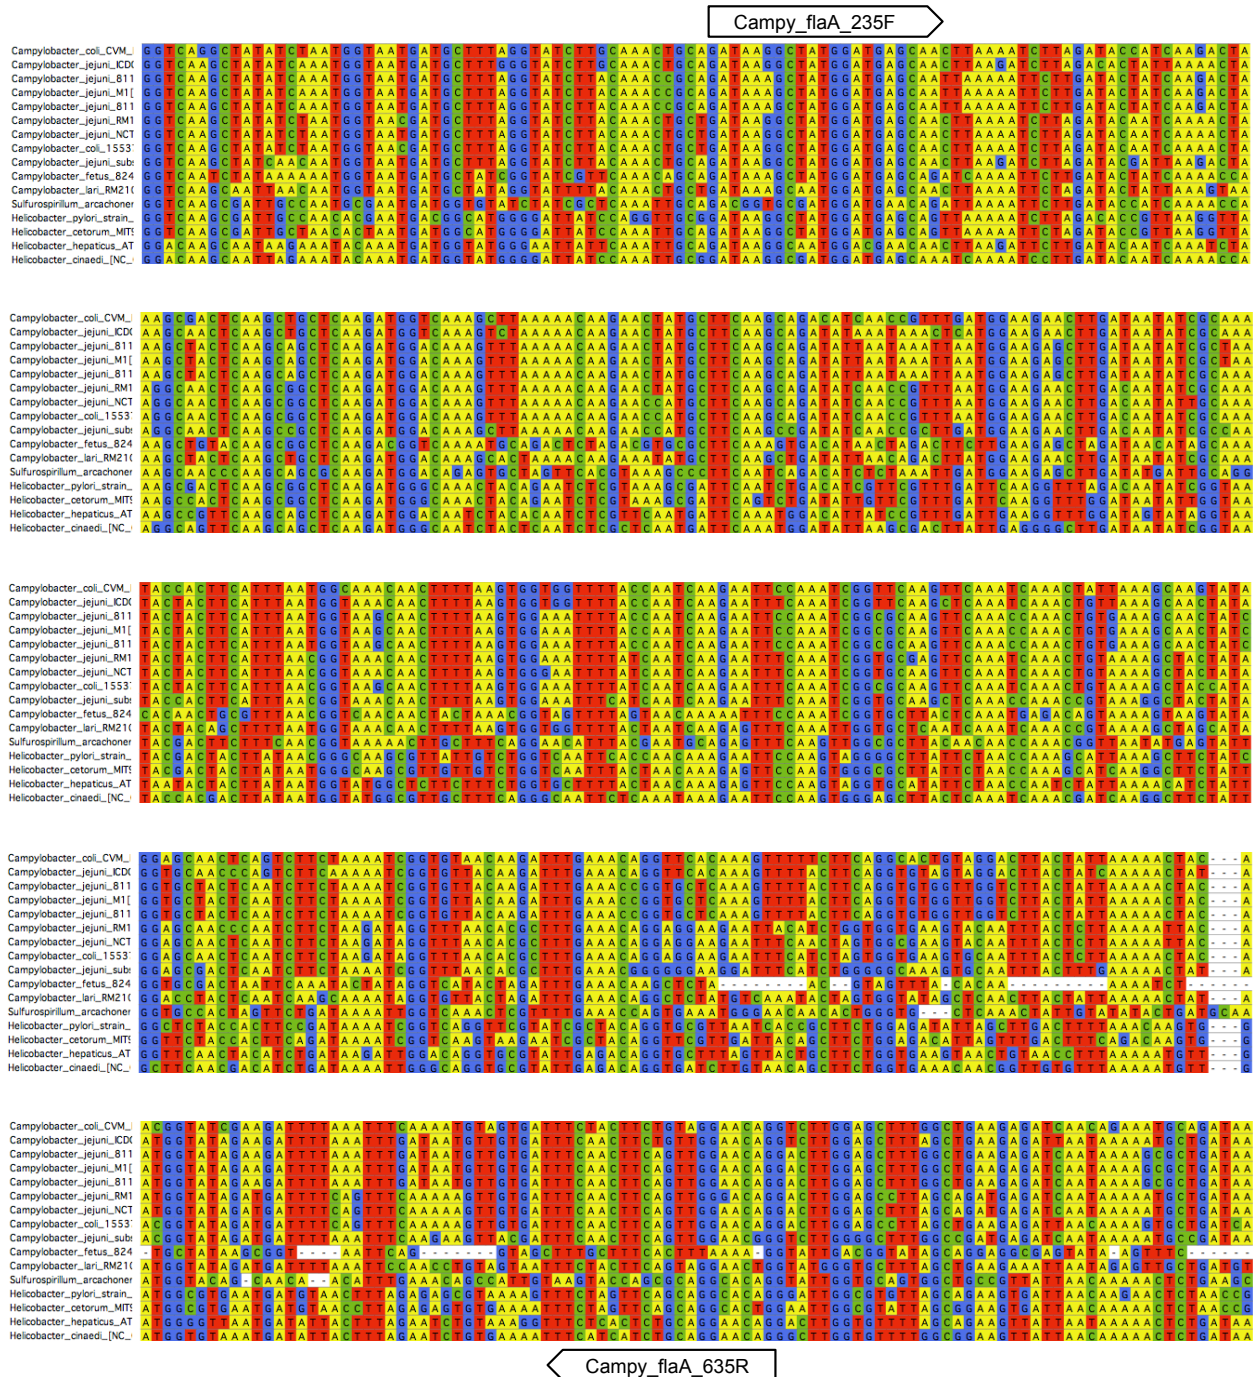

**Figure S1.** Annealing sites of the primers designed to amplify *flaA* from *Campylobacter* spp. Primer sequences are 5'-GATAARGCWATGGATGAGCA-3' for Campy\_flaA\_235F and 5'-CHGTYCCWACWGAAGTWGAA-3' for Campy\_flaA\_635R.

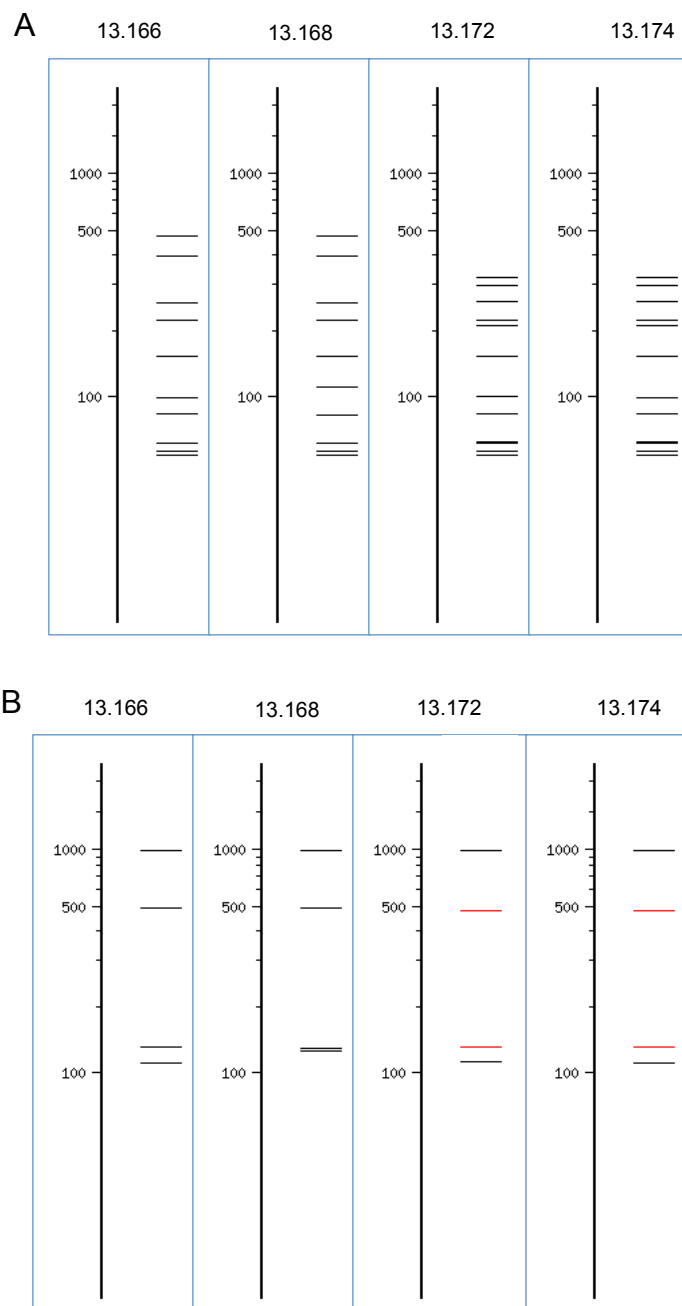

**Figure S2.** *In silico* digestion *flaA* amplicons with (A) *Dde* I and (B) *Hinf* I. *In silico* digestion was done using NEBcutter V2.0 software (<http://nc2.neb.com/NEBcutter2/>).

**Table S1.** Quantity of *flaA* measured by qPCR. Samples A–P and Q–Y were positive and negative, respectively, for *Campylobacter* strains. BDL, below detection limit (= 3 log<sub>10</sub>/g feces)

| Fecal sample ID                     | Quantity (log copies/g feces) |
|-------------------------------------|-------------------------------|
| 9/24/13                             | A                             |
|                                     | B                             |
|                                     | C                             |
|                                     | D                             |
|                                     | E                             |
|                                     | F                             |
| 10/4/13                             | G                             |
|                                     | H                             |
|                                     | I                             |
|                                     | J                             |
|                                     | K                             |
|                                     | L                             |
|                                     | M                             |
|                                     | N                             |
|                                     | O                             |
|                                     | P                             |
| Samples<br>negative for<br>isolates | Q                             |
|                                     | R                             |
|                                     | S                             |
|                                     | T                             |
|                                     | U                             |
|                                     | V                             |
|                                     | W                             |
|                                     | X                             |
|                                     | Y                             |

**Table S2.** Number of operational taxonomic units (OTUs), total number of sequence reads in OTUs, and coverage (%) as a function of number of duplicates ( $D$ ) and sequence alignment similarity ( $S$ ). We identified  $D = 50$  and  $S = 98\%$  as the optimal values to represent  $>95\%$  of all length-trimmed *flaA* sequence data. Number of unique sequences after singleton removal was 51629, which was used as a denominator when calculating coverage values.

|                              |     | Number of OTUs | Sequence alignment similarity ( $S$ )  |              |                                        |              |                                        |              |
|------------------------------|-----|----------------|----------------------------------------|--------------|----------------------------------------|--------------|----------------------------------------|--------------|
|                              |     |                | 97.00%                                 |              | 97.25%                                 |              | 97.50%                                 |              |
|                              |     |                | Total number of sequence reads in OTUs | Coverage (%) | Total number of sequence reads in OTUs | Coverage (%) | Total number of sequence reads in OTUs | Coverage (%) |
| Number of duplicates ( $D$ ) | 2   | 2108           | 51458                                  | 99.7         | 51367                                  | 99.5         | 51216                                  | 99.2         |
|                              | 3   | 971            | 51414                                  | 99.6         | 51310                                  | 99.4         | 51146                                  | 99.1         |
|                              | 5   | 473            | 51398                                  | 99.6         | 51284                                  | 99.3         | 51109                                  | 99.0         |
|                              | 10  | 186            | 51382                                  | 99.5         | 51261                                  | 99.3         | 51076                                  | 98.9         |
|                              | 25  | 46             | 51284                                  | 99.3         | 51101                                  | 99.0         | 50825                                  | 98.4         |
|                              | 50  | 16             | 51240                                  | 99.2         | 51044                                  | 98.9         | 50721                                  | 98.2         |
|                              | 100 | 11             | 51218                                  | 99.2         | 50994                                  | 98.8         | 50623                                  | 98.1         |

**Table S2 (continued)**

|                                      |     | Number of OTUs | Sequence alignment similarity ( <i>S</i> ) |              |                                        |              |                                        |              |
|--------------------------------------|-----|----------------|--------------------------------------------|--------------|----------------------------------------|--------------|----------------------------------------|--------------|
|                                      |     |                | 97.75%                                     |              | 98.00%                                 |              | 98.25%                                 |              |
|                                      |     |                | Total number of sequence reads in OTUs     | Coverage (%) | Total number of sequence reads in OTUs | Coverage (%) | Total number of sequence reads in OTUs | Coverage (%) |
| Number of duplicates<br>( <i>D</i> ) | 2   | 2108           | 50979                                      | 98.7         | 50553                                  | 97.9         | 49693                                  | 96.3         |
|                                      | 3   | 971            | 50867                                      | 98.5         | 50371                                  | 97.6         | 49448                                  | 95.8         |
|                                      | 5   | 473            | 50804                                      | 98.4         | 50251                                  | 97.3         | 49275                                  | 95.4         |
|                                      | 10  | 186            | 50750                                      | 98.3         | 50141                                  | 97.1         | 49088                                  | 95.1         |
|                                      | 25  | 46             | 50335                                      | 97.5         | 49481                                  | 95.8         | 48144                                  | 93.2         |
|                                      | 50  | 16             | 50135                                      | 97.1         | 49135                                  | 95.2         | 47641                                  | 92.3         |
|                                      | 100 | 11             | 49979                                      | 96.8         | 48875                                  | 94.7         | 47187                                  | 91.4         |

**Table S2 (continued)**

|                                      |     | Number of OTUs | Sequence alignment similarity ( <i>S</i> ) |              |                                        |              |                                        |              |
|--------------------------------------|-----|----------------|--------------------------------------------|--------------|----------------------------------------|--------------|----------------------------------------|--------------|
|                                      |     |                | 98.50%                                     |              | 98.75%                                 |              | 99.00%                                 |              |
|                                      |     |                | Total number of sequence reads in OTUs     | Coverage (%) | Total number of sequence reads in OTUs | Coverage (%) | Total number of sequence reads in OTUs | Coverage (%) |
| Number of duplicates<br>( <i>D</i> ) | 2   | 2108           | 48277                                      | 93.5         | 45731                                  | 88.6         | 41409                                  | 80.2         |
|                                      | 3   | 971            | 47921                                      | 92.8         | 45166                                  | 87.5         | 40685                                  | 78.8         |
|                                      | 5   | 473            | 47649                                      | 92.3         | 44721                                  | 86.6         | 39962                                  | 77.4         |
|                                      | 10  | 186            | 47255                                      | 91.5         | 44019                                  | 85.3         | 38716                                  | 75.0         |
|                                      | 25  | 46             | 45802                                      | 88.7         | 41929                                  | 81.2         | 35789                                  | 69.3         |
|                                      | 50  | 16             | 44906                                      | 87.0         | 40662                                  | 78.8         | 34096                                  | 66.0         |
|                                      | 100 | 11             | 44258                                      | 85.7         | 39816                                  | 77.1         | 33056                                  | 64.0         |
